# Supplementary material for: Transient Oligomerization of the SARS-CoV N Protein – Implication for Virus Ribonucleoprotein Packaging
Source: PubMed Central journal article supplement (PMC3662775; doi:10.1371/journal.pone.0065045), 2013-05-23
Supplement: pone.0065045.s001.pdf [file pone.0065045.s001.pdf]

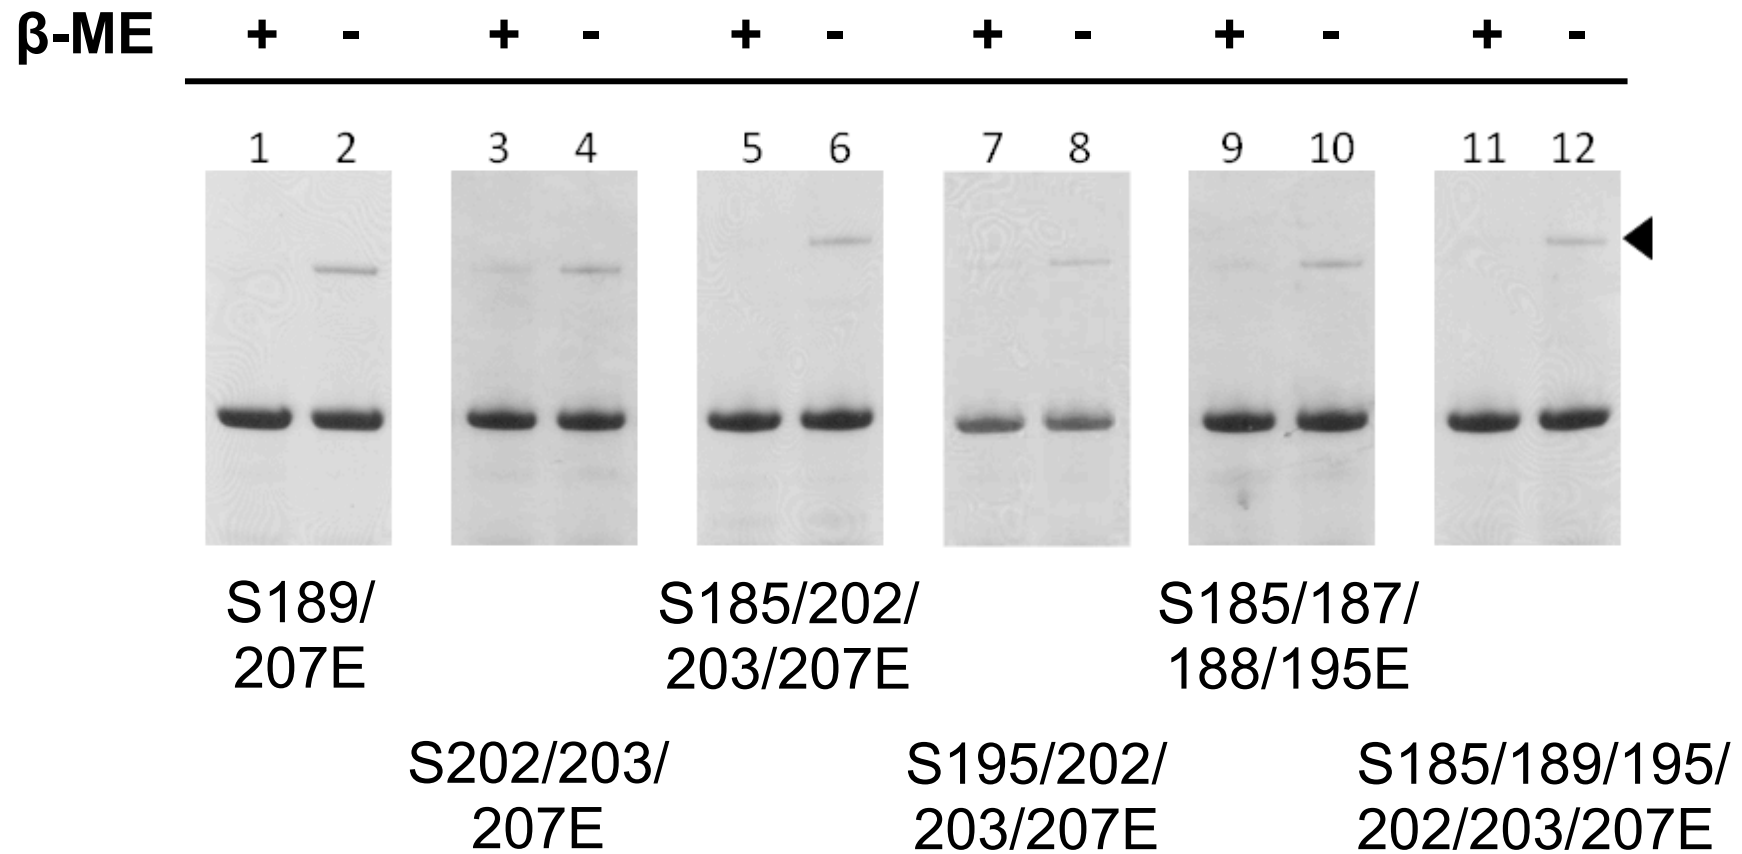

**Figure S1. Representative strips from SDS-PAGE of selected DD mutants after disulfide trapping. The arrow denotes the trapped species originating from tetramers or higher order oligomers.**
